# Supplementary material for: Getting palliative medications right across the contexts of homes, hospitals and hospices: protocol to synthesise scoping review and ethnographic methods in an activity theory analysis
Source: PubMed Central journal article supplement — BMJ Open. 2022 Mar 16;12(3):e061754. doi: 10.1136/bmjopen-2022-061754 (PMC8932278; doi:10.1136/bmjopen-2022-061754), 2022-03-16
Supplement: bmjopen-2022-061754.reviewer_comments.pdf [file bmjopen-2022-061754.reviewer_comments.pdf]

## PEER REVIEW HISTORY

BMJ Open publishes all reviews undertaken for accepted manuscripts. Reviewers are asked to complete a checklist review form (<http://bmjopen.bmj.com/site/about/resources/checklist.pdf>) and are provided with free text boxes to elaborate on their assessment. These free text comments are reproduced below.

## ARTICLE DETAILS

|                            |                                                                                                                                                                                           |
|----------------------------|-------------------------------------------------------------------------------------------------------------------------------------------------------------------------------------------|
| <b>TITLE (PROVISIONAL)</b> | Getting palliative medications right across the contexts of homes, hospitals, and hospices: protocol to synthesise scoping review and ethnographic methods in an Activity Theory analysis |
| <b>AUTHORS</b>             | Yardley, Sarah; Francis, Sally-Anne; Dean Franklin, Bryony; Ogden, Margaret; Kajamaa, Anu; Mattick, Karen                                                                                 |

This article was not externally reviewed at BMJ Open. Protocols that have been independently assessed prior to submission to BMJ Open are usually fast-tracked to publication on the grounds that further substantial changes will not be possible. This independent assessment will usually be external, independent review for both a substantial grant award from a non-commercial or government funder and ethics approval.
